# Supplementary material for: Global ocean surface heat fluxes revisited: A new dataset from maximum entropy production framework with heat storage and Bowen ratio optimizations
Source: Copernicus journal article supplement (doi:10.5194/essd-2024-420), 2024-10-10
Supplement: Supplementary file [file essd-2024-420-AC2-supplement.pdf]

## Responses to reviewers – ESSD-2024-420

**“Global ocean surface heat fluxes revisited: A new dataset from maximum entropy production framework with heat storage and Bowen ratio optimizations”**, by Yong Yang, Huaiwei Sun, Jingfeng Wang, Wenxin Zhang, Gang Zhao, Weiguang Wang, Lei Cheng, Lu Chen, Hui Qin, Zhazhang Cai, submitted to *Earth System Science Data*.

Dear Editors and Reviewers,

Thank you for your letter and for the reviewers' comments concerning our manuscript **ESSD-2024-420**. We appreciate editors and reviewers very much for the positive and constructive comments and suggestions.

Those comments are all valuable and very helpful for revising and improving our paper, as well as providing the important guidance for our researches. We have addressed all the comments carefully and made the revisions which we hope will meet your approval.

Below are our point-by-point responses to the comments raised by the referee. Comments of reviewers are **marked with the blue color**, and the corresponding responses are in black (begins with bold words of **“Response”**). Corresponding changes in the text of the manuscript appear **in red font**.

## Responses to Reviewer #2

### Reviewer #2: General Comments:

-----

This research presents a new approach to estimating ocean surface heat fluxes using an improved Maximum Entropy Production (MEP) framework. The integration of heat storage effects and empirical Bowen ratio formulas into the MEP model significantly enhances the accuracy of the original MEP theory. Overall, the manuscript is clearly written, and the methodology is well-structured. However, I have several comments below:

1. The manuscript does not sufficiently acknowledge the limitations of the proposed method. Including a brief section on limitations would provide a more balanced perspective.
2. There is inconsistent use of past and present tense throughout the manuscript, particularly in the methods and results sections. The distinction between past (for methods) and present (for results or general facts) should be thoroughly reviewed and corrected.

**Response:** We feel great thanks for your professional review work on our article. As you are concerned, there are several problems related with article's structure and the writing style that need to be addressed. According to your constructive suggestions, we have made extensive corrections to our previous draft, the detailed corrections are listed below.

**(1) Responses to general comment 1:** We sincerely appreciate your constructive and valuable comments. We agree with you that include a section on limitations can provide a more balanced perspective. Reviewer 1 also suggested that include a brief "Limitation" section is needed. According to your suggestions, we have supplemented a subsection

of “5.4 Limitations” in the “5. Discussion” section to discuss the limitations of our proposed methods and the results. In this subsection of “Limitations”, we have clarified the limitations on three perspectives: (1) Heat Storage Determination, (2) Bowen Ratio Improvement, and (3) Driving Mechanisms of Evaporation Trends. We have discussed these limitations in detail in this supplemented subsection. The corresponding revisions are as follows:

#### **“5.4 Limitations**

The improved MEP method proposed in this study offers a novel approach for estimating ocean heat fluxes, producing a validated long-term global dataset with high accuracy and spatiotemporal continuity. Despite its advancements, the proposed MEP method has several limitations that require further refinement: (1) Uncertainty of Driving data: The input variables of net radiation, heat storage, and sea surface temperature for the MEP model were sourced from the state-of-the-art satellite-based J-OFURO3 dataset. This dataset was constructed using observations from multiple satellite sensors. The net radiation in J-OFURO3 was derived by combining data from the CERES and the International Satellite Cloud Climatology Project (ISCCP) via the creeping sea fill method, along with twelve global sea surface temperature products (Tomitta, 2019). Consequently, the uncertainty of the MEP-estimated fluxes may arise from biases in input data derived from various satellite sensors and their associated analysis methods. Therefore, it is essential to integrate multiple approaches to assess the uncertainty associated with the input datasets. Moreover, due to the limited temporal duration of the J-OFURO3 dataset, future work should utilize input datasets with longer time series, finer spatio-temporal resolution (Liang et al., 2022), and higher accuracy to advance ocean heat flux estimations using the MEP method. (2) Heat Storage Determination: This study did not employ a direct calculation method to obtain heat storage. Given the unclear relationship between heat storage and changes in ocean heat content at varying depths (as shown in Table 4), we utilized an energy balance residual-based approach to indirectly estimate heat storage. Consequently, this may render the MEP method susceptible to uncertainties in heat storage data derived from auxiliary flux datasets. Future research should focus on understanding the relationship between ocean heat content changes in the upper 100m and heat storage, with the goal of establishing a functional relationship between water column temperature at different

depths and heat storage. (3) Bowen Ratio Improvement: Accurate determination of the Bowen ratio in high-latitude regions remains challenging. The Bowen ratio derived from the MEP method showed significant discrepancies with other datasets in these areas (Fig. 10), particularly in sea-ice-covered Arctic regions, where other datasets exhibited notable overestimations and irregular fluctuations. Therefore, incorporating more observational data from high-latitude regions is essential for a better understanding of energy partitioning patterns.”

(Line 773-799, in Section 5.4)

## **(2) Responses to general comment 2:**

Thank you very much for your constructive comments. We have carefully checked the usage of tense throughout the manuscript and corrected the errors accordingly. To keep a consistent use of past and present tense throughout the manuscript, we have thoroughly reviewed and corrected the tense in each section as: Introduction (present for general statement, and past for previous studies), Methods (past for experimental procedure, and present for general facts), Results (past for detailed results), Discussion (present for the implications or general conclusion, and past for specific results), and Conclusion (present for general statement, and past for completed work). We have made extensive revisions to our previous manuscript carefully, and the detailed parts of the revisions are listed below:

### **“Introduction” section:**

“The global multi-year averaged  $LE$  estimated by the MEP model indicated a value around...”

“Conversely, MEP estimated an averaged  $H$  of approximately  $28 \text{ W}\cdot\text{m}^{-2}$ , substantially higher the  $6\text{-}18 \text{ W}\cdot\text{m}^{-2}$  range reported in other studies.”

### **“Methods” section:**

“This study introduced two key hypotheses...”

“To address this, the study proposed two approaches for...”

“for instance, the Priestley–Taylor coefficient was expressed as...”

“The revised reciprocal actual Bowen ratio was represented as...”

“Thus, the workflow of the improved MEP model was conducted as...”

“the sensitivity coefficient ( $S$ ) was computed as...”

“The accuracy of the heat storage dataset was assessed using three approaches:”

“...this study selected the optimal heat storage dataset...”

“The performance of both the original and improved Maximum Entropy Production (MEP) models was evaluated...”

“Bowen ratio formula for the MEP model was then determined...”

“Subsequently, the improved MEP model was applied to...”

“...driving the improved MEP model were derived from...”

“About 96% of selected sites (124 of 129 all sites) were collected from...”

“The observational sites covered the spatial range...”

“Observational meteorological variables and heat fluxes included the...”

“The surface air-sea fluxes of buoy observations were computed...”

“...records were in monthly temporal...”

“...observations of KEO and Papa had been aggregated...”

“The spatially distributed map of all selected sites was illustrated in Fig.S1. ”

“This study evaluated and compared 7 global turbulent heat flux...”

“These seven products encompassed monthly...”

“...with reported studies were available in Tang et al (2023)”

“Remote sensing data for heat storage ( $G$ ) was primarily derived from two categories: the first category included data obtained from the residual of the energy balance equation ( $R_n - LE - H$ ), including J-OFURO3, ERA5, and MERRA2; the second category was calculated from...”

“The ocean heat content data was obtained from...”

“Since the OHC variation from 0~100m depth exhibited the smallest...”

“This study assessed the suitability of  $G$  flux and...”

“This study evaluated the accuracy of all the variables...”

“To maintain consistency in the analysis, this study resampled all products...”

## **“Results” section:**

“we showed the comparisons of...”

“The original MEP model (without considering heat storage) showed a significant...”

“where the RMSE of  $LE$  was  $134.6 \text{ W}\cdot\text{m}^{-2}$  and that of  $H$  was  $37...$ ”

“the MEP-simulated  $LE$  showed a good consistency...”

“the MEP\_M method revealed a significant...”

“Specifically,  $LE$  was underestimated by 25%...”

“This finding agreed with previous research...”

“After incorporating the effects of heat storage, four variants of the MEP model were developed by...”

“These variants were defined as follows...”

“Adjusting the Bowen ratio significantly improved the accuracy...”

“which was lower than that derived from...”

“the improved MEP models demonstrated relatively lower...”

“the  $M_{0.24}$  formula exhibited the smallest RMSE...”

“while the  $M_{0.79}$  formula showed the...”

“This consistency was also evident in the...”

“In the original MEP theory, the estimated  $LE$  exhibited an...”

“It was noteworthy that the original MEP...”

“This delay indicated that the heat storage effect delayed the peak of  $LE$  and altered the seasonal variations...”

“This discrepancy suggested that...”

“Therefore, the impact of heat storage was substantial and cannot be disregarded.”

“MEP-derived  $G$  showed a good correlation...”

“Both MEP-derived  $G$  and  $Q$  fluxes were significantly underestimated.”

“considering the influence of heat storage was crucial for...”

“The results suggested that improved...”

“It was evident that J-OFURO3...”

“The study underscored the importance of...”

“The heat storage derived from J-OFURO3 data showed high consistency...”

“Therefore, this study employed the heat storage data...”

“this study employed the best-performed improved...”

“Therefore, the improved MEP method provided a more reasonable...”

“the MEP-derived latent heat exhibited higher values in low-latitude regions but significantly decreased beyond...”

“The highest *LE* values were observed in...”

“The MEP estimated *LE* exhibited a similar spatial...”

“For sensible heat, MEP-derived *H* closely resembled that of...”

“MEP generally estimated *H* within an intermediate range compared to other products, displaying a distribution that was more reasonable...”

“the ranking of best-performed *LE* products was as...”

“The improved MEP model achieved accurate *LE* estimation after...”

“Globally, the median Bowen ratios of the products were as follows...”

“Spatially, the MEP Bowen ratio resembled ERA5 in mid to low latitudes but exhibited deviations from...”

“This discrepancy was likely due to the...”

“a polynomial regression method was employed to...”

“It was indicated that regions with significant increases...”

“This consistency was in line with previous...”

**“Discussion” section:**

“The sensitivity analysis revealed the...”

“the heat storage (*G*) exhibited seasonal variations...”

“The analysis indicated that  $R_n$  significantly influenced...”

“For instance, a 10% decrease in positive *G* yielded a 7.4% increase...”

“This formula was applicable for surface temperatures...”

“The coefficients were based on a mean  $\alpha$  value of 1.26...”

“The improved MEP model provided precise *LE* estimates...”

“This study applied the improved MEP model to ocean surface...”

### Specific Comments:

(1) Title: Consider replacing “optimizations” with a more appropriate term.

Response: We gratefully appreciate for your valuable suggestion. In this study, we used the empirical Bowen ratio formulas to modify the original MEP Bowen ratio, we think this correction is an “adjustment” to the Bowen ratio of original MEP method. Therefore, we replaced the “optimizations” with the term “adjustment”, and the revised title is as:

“Global ocean surface heat fluxes derived from the maximum entropy production framework accounting for ocean heat storage and Bowen ratio adjustments”

(Lin 1-3, in the “Title”)

(2) Abstract: Briefly explain what the Bowen ratio is, as it is a key concept in the manuscript.

Response: Thanks for your helpful comment. We have added the explanation on the “Bowen ratio” in the “Abstract” section, and the revision is as:

“This study derived global ocean heat fluxes using the MEP theory, incorporating the effects of heat storage and adjustments to the Bowen ratio (the ratio of sensible heat to latent heat)”

(Line 27-29, in the “Abstract” section)

(3) The abstract emphasizes the adjustments to the Bowen ratio but should also explain why accounting for heat storage is critical.

**Response:** Thanks for your helpful comment. We agree with this comment that the importance of accounting for heat storage should be explained in the Abstract. We have added the explanation on the importance of considering heat storage as follows:



“Given the substantial heat storage capacity of the deep ocean, which can create temporal mismatches between variations in heat fluxes and radiation, it is crucial to account for heat storage when estimating heat fluxes.”

(Line 25-27, in the “Abstract” section)

(4) L30: Replace “improve” with “improves”.

Response: Thank you for pointing this out. The Reviewer 1 also suggested that “(4) Lin 29-31, The statement needs to be re-organized”. Therefore, we have rewritten this sentence and revised it as:

“By incorporating the heat storage effect and adjusting the Bowen ratio within the MEP model, the accuracy of the estimated heat fluxes was significantly improved, achieving an  $R^2$  of 0.99...”

(Line 32-33, in the “Abstract” section)

(5) L33-L34: Provide more information to justify why the specific values mentioned here are significant.

**Response:** Thank you for your comment. This study provides new estimates of global annual average latent heat ( $93 \text{ W}\cdot\text{m}^{-2}$ ) and sensible heat flux ( $12 \text{ W}\cdot\text{m}^{-2}$ ). Compared with the estimates by the original MEP model (in Table 5), i.e., latent heat flux of  $52.7 \text{ W}\cdot\text{m}^{-2}$  and sensible heat flux of  $25.1 \text{ W}\cdot\text{m}^{-2}$ , the improved MEP model has effectively corrected the underestimation of LE and overestimation of sensible heat by the original model. Therefore, we have added the reason why we mentioned the specific values here, and the revision is as:

“The improved MEP method successfully addressed the underestimation of *LE* and the overestimation of sensible heat by the original model, providing new global estimates

of  $LE$  at  $93 \text{ W}\cdot\text{m}^{-2}$  and sensible heat at  $12 \text{ W}\cdot\text{m}^{-2}$  for the annual average from 1988 to 2017.”

(Line 34-37, in the “Abstract”)

(6) L42: Revise “the water cycle and climate change” to “water cycle, and climate change”.

**Response:** Thank you for your helpful comment. We have revised this sentence according to your comment as:

“This dataset provides a new benchmark for the ocean surface energy budget and is expected to be a valuable resource for studies on global ocean warming, sea surface-atmosphere energy exchange, the water cycle, and climate change.”

(Line 42-44)

(7) L111-L112: Add more background information to explain why investigating the impact of heat storage is important.

**Response:** We gratefully appreciate for your valuable suggestion. According to your comment, we have added detailed background descriptions to explain the influences of heat storage and why investigating the impact of heat storage is important for estimating heat fluxes. Furthermore, the necessity about why incorporating heat storage in the MEP model is also described in Section 2.2.2 as: “This study introduced two key hypotheses: (1) The substantial heat storage capacity of the ocean can exert a significant influence on seasonal latent and sensible fluxes, potentially introducing bias to the MEP equations...”. The content of the added background information is as follows:

“These substantial errors in MEP-estimated oceanic fluxes may be attributed to the lack of consideration of heat storage effects. The significant impact of heat storage in deep ocean water can introduce substantial bias in estimating seasonal evaporation rates

when using the Penman combination-based method (McMahon et al., 2013; Bai & Wang et al., 2023). For instance, deep-water bodies typically store heat during the spring and release it in the fall, which can lead to overestimation of evaporation in the summer and underestimation in the fall if changes in heat storage are not accounted for (Zhao & Gao, 2019; Morton, 1994). Therefore, when estimating heat fluxes using the Bowen ratio ( $B_o$ , defined as the ratio of  $H$  to  $LE$ ) energy budget-based method (including the MEP method), it is essential to incorporate heat storage effects to ensure accurate partitioning of available energy.”

(Line 91-99, in “Introduction” section)

#### References:

[1] Morton, F. I.: Evaporation research—a critical review and its lessons for the environmental sciences. *Critical Reviews in Environmental Science and Technology*, 24(3), 237–280. <https://doi.org/10.1080/10643389409388467>, 1994.

[2] McMahon, T. A., Peel, M. C., Lowe, L., Srikanthan, R., & McVicar, T. R.: Estimating actual, potential, reference crop and pan evaporation using standard meteorological data: a pragmatic synthesis. *Hydrology and Earth System Sciences*, 17(4), 1331-1363, <https://doi.org/10.5194/hess-17-1331-2013>, 2013.

[3] Bai, P., & Wang, Y.: The importance of heat storage for estimating lake evaporation on different time scales: Insights from a large shallow subtropical lake. *Water Resources Research*, 59, e2023WR035123. <https://doi.org/10.1029/2023WR035123>, 2023.

(In the “References” section)

(8) L120: Add “and” before “ $R_{nl}$ ”.

**Response:** Thank you for your helpful comment. We have revised it as:

“where  $R_n$ ,  $R_{ns}$ , and  $R_{nl}$  are net radiation, net shortwave radiation...”

(Line 138, in Section 2.1)

(9) L122: Replace the period with a semicolon.

**Response:** Thank you for your helpful comment. We have revised it as:

“where  $R_n$ ,  $R_{ns}$ , and  $R_{nl}$  are net radiation, net shortwave radiation (the difference of incoming radiation  $R_s^\downarrow$  and reflected solar radiation  $R_s^\uparrow$ ), and net longwave radiation (the difference of incoming longwave radiation  $R_l^\downarrow$  and outgoing longwave radiation  $R_l^\uparrow$ ), respectively;  $H$  is sensible heat,  $LE$  is latent heat...”

(Line 140, in the Section 2.1)

(10) L131-L132: Rewrite this sentence for better clarity.

**Response:** Thank you for your helpful comment. There is a writing mistake in the original draft, it should be “Since the previous study overlooked the calculation of lateral heat flux transported by ocean currents...”, thanks for correcting this error. We have rewritten this sentence as:

“Since the lateral heat transport by ocean currents is zero at the global scale (Wang et al., 2021),  $G$  can be regarded as equivalent to the change in ocean heat content or heat storage at the global level.”

(Line 149-151, in the Section 2.1)

(11) L137: Correct “simulate” to “simulates”.

**Response:** Thank you for your helpful comment. We have revised it as:

“The MEP model simulates ocean surface heat fluxes...”

(Line 155, in the Section 2.2.1)

(12) L145, L177, L194: Remove the unnecessary space before “where”.

**Response:** Thank you for pointing this out. We have removed the space before “where” in L145, L177, and L194.

(13) L161: This information is redundant and consider removing it.

**Response:** Thank you for pointing this out. We have removed this sentence in Line 161 and the revision is as:

“According to the MEP theory, the net solar radiation...”

(Line 179, in the Section 2.2.1)

(14) Subsection 2.3: This section should be reorganized. It primarily describes methods rather than data, which could confuse readers.

**Response:** Thank you for your constructive comment. We agree that this helpful suggestion will improve the structure of the manuscript. We have revised the relevant sentences and moved Subsection 2.3 to Section 3.1 in the “Data materials” section. The revised content now reads as follows:

### “3.1 Input data for MEP model

The performance of both the original and improved Maximum Entropy Production (MEP) models is evaluated using observed data from in-situ buoy stations, as described in Section 3.2. The optimal empirical Bowen ratio formula for the MEP model is then determined through multi-site assessments. Subsequently, the improved MEP model is applied to estimate global heat fluxes using long-term remote sensing data, as detailed in Sections 3.3 and 3.4. Specifically, the input variables of net radiation, heat storage, and sea surface temperature driving the improved MEP model are derived from the J-OFURO3 dataset, spanning 1988 to 2017 with a spatial resolution of  $0.25^\circ$ , as outlined

in Section 4.3.”

(Line 246-253, in Section 3.1)

(15) L221-L225: this is not quite clear.

**Response:** Thanks for your constructive comment. This paragraph aims to elaborate that we attempt to derive a heat storage dataset with the best accuracy by assessing the performances of individual datasets and fused dataset (AA and BTCH). According to your helpful comment, we have rewritten this paragraph to improve the clarity, making it more logical and coherent, and the revision is as:

“To drive the improved MEP model with high-quality input data, this study aims to obtain a heat storage dataset with optimal accuracy. The accuracy of the heat storage dataset was assessed using three approaches: (1) individual dataset, (2) a fused dataset generated using the Bayesian Three-Cornered Hat (BTCH) method (He et al., 2020), and (3) an ensemble means obtained through the arithmetic average (AA) method. Previous studies have demonstrated that the BTCH method effectively quantifies uncertainties across diverse datasets and improves accuracy by integrating multiple datasets without requiring prior knowledge (Long et al., 2017; Liu et al., 2021; Duan et al., 2024). A recent study further evaluated various data fusion methods, including BTCH and the AA method, for addressing uncertainties in global evapotranspiration estimates derived from different datasets. The findings revealed that while both BTCH and AA are effective in identifying lower-quality ET datasets, their ability to consistently produce higher-accuracy datasets remains uncertain and, in some cases, may even degrade the overall accuracy (Shao et al., 2022). The performance of these fusion methods is highly sensitive to the selection of input datasets. For instance, the AA method is particularly susceptible to the influence of lower-quality datasets, especially when the sample size is small. Similarly, the performance of BTCH diminishes as the error covariance among the included datasets increases.”

(Line 228-241, in Section 2.4)

(16) L228: Better to include more elaboration of “For instance, the AA method...”.

**Response:** Thanks for your helpful comment. We have elaborated on this viewpoint in detail, and described the advantages and limitations of the BTCH and AA methods in fusing datasets. The revision is as:

“The findings revealed that while both BTCH and AA are effective in identifying lower-quality ET datasets, their ability to consistently produce higher-accuracy datasets remains uncertain and, in some cases, may even degrade the overall accuracy (Shao et al., 2022). The performance of these fusion methods is highly sensitive to the selection of input datasets. For instance, the AA method is particularly susceptible to the influence of lower-quality datasets, especially when the sample size is small. Similarly, the performance of BTCH diminishes as the error covariance among the included datasets increases. Consequently, following a comparative analysis of the accuracy of individual, BTCH, and AA fusion datasets, this study selected the optimal heat storage dataset to drive the MEP model.”

(Line 236-243, in Section 2.4)

(17) L326: Replace “exceeds” with “exceeding”.

**Response:** Thank you for your helpful comment. We have revised it as:

“The original MEP model (without considering heat storage) showed a significant negative correlation between  $LE$  and  $H$  (with  $R^2$  exceeding 0.65 as...)”

(Line 343-344, in Section 4.1)

(18) L331, L339-L341, L359-L360: These sentences should be rewritten to enhance clarity.

**Response:** Thanks for your helpful comments. We have rewritten these sentences to enhance clarity, ensure logical flow, and refine the language, the revisions are as:

“After incorporating the influence of heat storage effects (represented as  $MEP\_M$ , as depicted in Fig.1b and Fig.1h), the MEP-simulated  $LE$  showed a good consistency with buoy observations, with an  $R^2$  value of 0.97 and a reduced RMSE of  $27 \text{ W}\cdot\text{m}^{-2}$ . However, the  $MEP\_M$  method revealed a significant bias in the partitioning of  $LE$  and  $H$  from the available energy. Specifically,  $LE$  was underestimated by 25% (regression slope = 0.75), while  $H$  was overestimated by 46% compared to observations.”

(Line 346-350, in Section 4.1)

“After incorporating the effects of heat storage, four variants of the MEP model were developed by replacing  $B_o^*$  with  $B_{oa}$  derived from four different empirical formulas. These variants were defined as follows:  $M_{0.24}$  (where  $B_{oa}=0.24 B_o^*$ ),  $M_{0.79}$  (where  $B_{oa}=0.79 B_o^*-0.21$ ),  $M_{0.63}$  (where  $B_{oa}=0.63B_o^*-0.15$ ), and  $M_{0.37}$  (where  $B_{oa}=0.37B_o^*-0.05$ ). Adjusting the Bowen ratio significantly improved the accuracy of the energy flux estimates.”

(Line 357-361, in Section 4.1)

“Specifically, the spatial patterns of simulated errors for the four variants of the MEP model were obtained (Fig. 2), along with the errors across different observational buoy arrays (Fig. 3). Overall, the four variants of the improved MEP models demonstrated relatively lower bias at low latitudes ( $10^\circ\text{S}$  to  $10^\circ\text{N}$ ) but exhibit larger bias in higher latitude regions (above  $15^\circ\text{N}$ ), particularly at the KEO, WHOTS, and STRATUS buoy sites.”

(Line 376-380, in Section 4.1)

(19) L381: Replace “decision” with “selection” or “choice”.

**Response:** Thanks for your helpful comments. We have revised it as:



“This selection was based on the site’s long-term...”

(Line 402, in Section 4.2)

(20) L385: Change “128 other sites” to “other 128 sites”.

**Response:** Thanks for your helpful comments. We have revised it as:

“The improved MEP methods demonstrated comparable performance in estimating heat fluxes at the KEO site when compared with other 128 sites...”

(Line 404-405, in Section 4.2)

(21) L415: Change “closest to” to “were closest to”.

**Response:** Thanks for your helpful comments. We have revised it as:

“Among the four empirical formulas,  $M_{0.24}$  simulated  $LE$ ,  $H$ , and Bowen ratio values were closest to the observed values”

(Line 436-437, in Section 4.2)

(22) L427-L428: Replace “meters” with “m”.

**Response:** Thanks for your helpful comments. We have revised it as:

“On deep ocean surfaces, with the most recent average depth estimate of 3,682m from NOAA satellite measurements, heat storage variations can influence depths up to 6,000m”

(Line 449-450, in Section 4.2)

(23) L437: Change “originates” to “originate” and add “the” before “heat storage”.

**Response:** Thanks for your helpful comments. We have revised the tense to keep consistency throughout the paper as follows:

“Therefore, the prediction errors in *LE* and *H* originated from the inability to accurately quantify the heat storage.”

(Line 458-459, in Section 4.2)

(24) L468: Replace “failed” with “fails”.

**Response:** Thanks for your helpful comments. We have revised the tense to keep consistency throughout the paper as follows:

“The results revealed that while using the AA method (e.g., AA4) to fuse yields smaller errors compared to ERA5, MERRA2, and  $\Delta$ OHC, it still failed to achieve the accuracy of the J-OFURO3 product”

(Line 490-491, in Section 4.3.2)

(25) L474: Capitalize “surface temperature” and italicize “SST”.

**Responses:** Thank you for pointing this out. The revised text reads as follows.

“To ensure consistency with radiation data source, the Sea Surface Temperature (*SST*) data from J-OFURO3 was utilized for...”

(Line 497, in Section 4.3.2)

(26) Figure 8: Add p-values here as well.

**Response:** Thank you for pointing this out. According to your comment, we have added p-value ( $p < 0.001$ ) in the Figure 8 as:

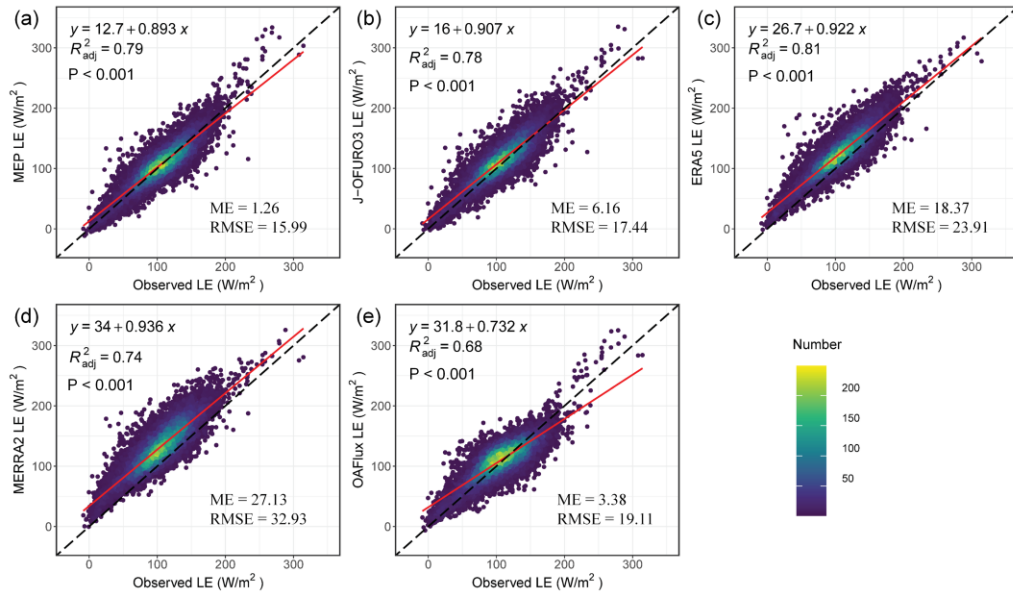

**Figure 8.** Scatter density plots of latent heat flux taken from different products versus observations from 129 buoy stations during the period 1988-2017: (a) Improved MEP model, (b) J-OFURO3, (c) ERA5, (d) MERRA2, and (e) OAF flux. A total of 15444 records of latent heat observations are included.

(In Figure 8)

(27) L611-L613: Rewrite this sentence for clarity.

**Response:** Thanks for your helpful comments. We have rewritten this sentence to improve the clarity, making it more logical and coherent. The sentence is revised as:

“The spatiotemporal patterns of evaporation were analyzed using the Sen’s slope and Mann-Kendall test methods (Fig. 11). For the global ocean, approximately 74% of the regions showed an increasing trend, with about 27% of the grids exhibiting statistically significant increases ( $p < 0.05$ ). In contrast, 26% displayed a decreasing trend, with only 5% of the grids showing statistically significant decrease ( $p < 0.05$ ).”

(Line 630-634, in Section 4.5)

(28) Figure 11: Please confirm the trend legend colors used are consistent with the map colors.

**Response:** Thank you for pointing this out. The reviewer 1 also pointed out that the spatial-temporal variability of ocean evaporation should be analyzed at two separate periods. Therefore, we have revised the Figure 11 to include more result. Also, we have made sure that the trend legend colors used are consistent with the map colors. The revised Figure 11 is as:

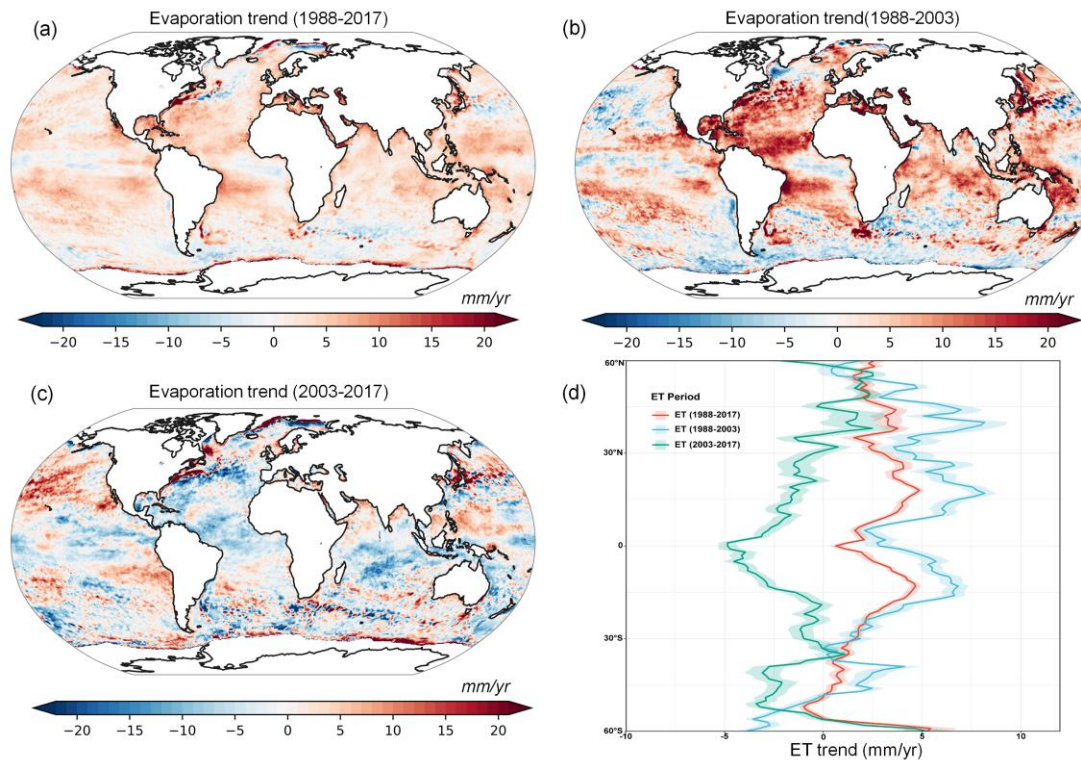

**Figure 11.** Spatial distribution of multi-year trends in ocean evaporation estimated by the improved MEP method during (a) the period 1988-2017, (b) the period 1988-2003, (c) the period 2003-2017, and (d) the latitudinal average changes across three different periods.

(In Figure 11)

(29) L644: Add “the” before “impact”.

**Responses:** Thank you for pointing this out. The revised text reads as follows.

“5.1 Quantifying the impact of heat storage and radiation with sensitivity analysis”

(Line 680, in Section 5.1)

(30) L716: Add “original” before “MEP”.

**Responses:** Thank you for pointing this out. The revised text reads as follows.

“This study addresses the issue of underestimating *LE* by the original MEP model...”

(Line 746-747, in Section 5.3)

(31) L724-L726: This transition sentence needs revision for smoother flow.

**Response:** Thanks for your helpful comment. According to your comment, we have revised these sentences to improve the clarity, making it more logical and coherent. The revised text reads as follows:

“From a methodological perspective, the improved MEP method emerged as a novel approach for estimating energy fluxes that diverges from traditional bulk methods. The conventional bulk method requires multiple input parameters, including air temperature, specific humidity, wind speed, sea surface temperature, atmospheric pressure, and the observational height of all parameters (Fairall et al., 2003; Tomita et al., 2021). This method demands numerous input variables, and the estimated fluxes are highly sensitive to changes in temperature and humidity gradients. In contrast, the improved MEP model requires only net radiation, heat storage, surface temperature, and atmospheric pressure to simultaneously obtain latent and sensible heat fluxes, making it more flexible to operate and robust against variations in input variables.”

(Line 752-759, in Section 5.3)

(32) L734: Add “the” before “major advantage of MEP”.

**Response:** Thanks for your helpful comment. The revised text reads as follows:

“Compared to the Penman model for water body evaporation (Tian et al., 2022; Zhao

et al., 2022; Bai et al., 2023), the major advantage of MEP method lies in...”

(Line 766-767, in Section 5.3)

Once again, thank you very much for your valuable comments and suggestions. We hope that the revisions in the manuscript and our accompanying responses will be sufficient to make our manuscript suitable for publication in *ESSD*.
